# Supplementary material for: Solvent-dependent supramolecular self-assembly of boron cage pillared metal–organic frameworks for selective gas separation
Source: Royal Society of Chemistry journal article supplement (doi:10.1039/d0ce00142b), 2020-01-01
Supplement: d0ce00142b1.pdf [file d0ce00142b1.pdf]

## Supporting Information

“Solvent dependant supramolecular self-assembly of boron cage pillared metal-organic frameworks for selective gas separation”

Yuanbin Zhang,<sup>ab</sup> Lingyao Wang,<sup>c</sup> Jianbo Hu,<sup>ab</sup> Simon Duttwyler<sup>c</sup> Huabin Xing<sup>ab</sup>

Xili Cui,<sup>\*ab</sup>

---

<sup>a</sup> Key Laboratory of Biomass Chemical Engineering of Ministry of Education, College of Chemical and Biological Engineering, Zhejiang University, Hangzhou 310027, China. E-mail: cuixl@zju.edu.cn

<sup>b</sup> Institute of Zhejiang University - Quzhou, 78 Jiu Hua Boulevard North, Quzhou 324000, China.

<sup>c</sup> Department of Chemistry, Zhejiang University, Hangzhou 310027, China.

**Table S1.** Langmuir-Freundlich parameters fit for C<sub>2</sub>H<sub>2</sub>, CO<sub>2</sub> and C<sub>2</sub>H<sub>4</sub> adsorption in BSF-4.

|                                            | Site A                      |                                     |                | Site B                      |                                     |                | correlation coefficient (R <sup>2</sup> ) |
|--------------------------------------------|-----------------------------|-------------------------------------|----------------|-----------------------------|-------------------------------------|----------------|-------------------------------------------|
|                                            | q <sub>A,sat</sub> (mol/kg) | b <sub>A</sub> (kPa <sup>-1</sup> ) | V <sub>A</sub> | Q <sub>B,sat</sub> (mol/kg) | b <sub>A</sub> (kPa <sup>-1</sup> ) | V <sub>B</sub> |                                           |
| <b>C<sub>2</sub>H<sub>2</sub><br/>273K</b> | 1.410                       | 1.748                               | 0.985          | 3.439                       | 0.038                               | 0.607          | 0.99998                                   |
|                                            | 1.629                       | 1.600                               | 1              | 1.764                       | 0.017                               | 1              | 0.99990                                   |
| <b>C<sub>2</sub>H<sub>2</sub><br/>298K</b> | 1.622                       | 0.435                               | 0.958          | 2.683                       | 0.006                               | 0.922          | 0.99999                                   |
|                                            | 2.027                       | 0.0066                              | 1              | 1.578                       | 0.452                               | 1              | 0.99997                                   |
| <b>C<sub>2</sub>H<sub>2</sub><br/>313K</b> | 2.204                       | 0.007                               | 0.882          | 1.30                        | 0.214                               | 1.042          | 0.99993                                   |
|                                            | 2.106                       | 0.003                               | 1              | 1.429                       | 0.202                               | 1              | 0.99993                                   |
| <b>CO<sub>2</sub><br/>298K</b>             | 2.506                       | 0.0166                              | 1              | --                          | --                                  | --             | 0.99998                                   |
| <b>C<sub>2</sub>H<sub>4</sub><br/>298K</b> | 1.656                       | 0.079                               | 0.972          | 1.018                       | 4.75E-06                            | 2.19           | 0.99996                                   |
|                                            | 1.727                       | 0.0684                              | 1              |                             |                                     |                | 0.9991                                    |

**Table S2.** Langmuir-Freundlich parameters fit for C<sub>3</sub>H<sub>8</sub>, C<sub>2</sub>H<sub>6</sub> and CH<sub>4</sub> adsorption in BSF-5 at 298 K.

|                                   | Site A                      |                                     |                | Site B                      |                                     |                | correlation coefficient (R <sup>2</sup> ) |
|-----------------------------------|-----------------------------|-------------------------------------|----------------|-----------------------------|-------------------------------------|----------------|-------------------------------------------|
|                                   | q <sub>A,sat</sub> (mol/kg) | b <sub>A</sub> (kPa <sup>-1</sup> ) | V <sub>A</sub> | Q <sub>B,sat</sub> (mol/kg) | b <sub>A</sub> (kPa <sup>-1</sup> ) | V <sub>B</sub> |                                           |
| <b>C<sub>3</sub>H<sub>8</sub></b> | 1.171                       | 0.00756                             | 1.002          | 0.5677                      | 0.1216                              | 1.8426         | 0.9991                                    |
| <b>C<sub>2</sub>H<sub>6</sub></b> | 4.168                       | 0.0189                              | 0.4656         | 0.1206                      | 0.022                               | 1.991          | 0.9996                                    |
| <b>CH<sub>4</sub></b>             | 0.435                       | 0.0009                              | 1.546          | 0.322                       | 0.059                               | 0.575          | 0.9999                                    |
|                                   | 1.056                       | 0.005                               | 1              | 0.021                       | 1.937                               | 1              | 0.9999                                    |
|                                   | 0.806                       | 0.0086                              | 1              | --                          | --                                  | --             | 0.998                                     |

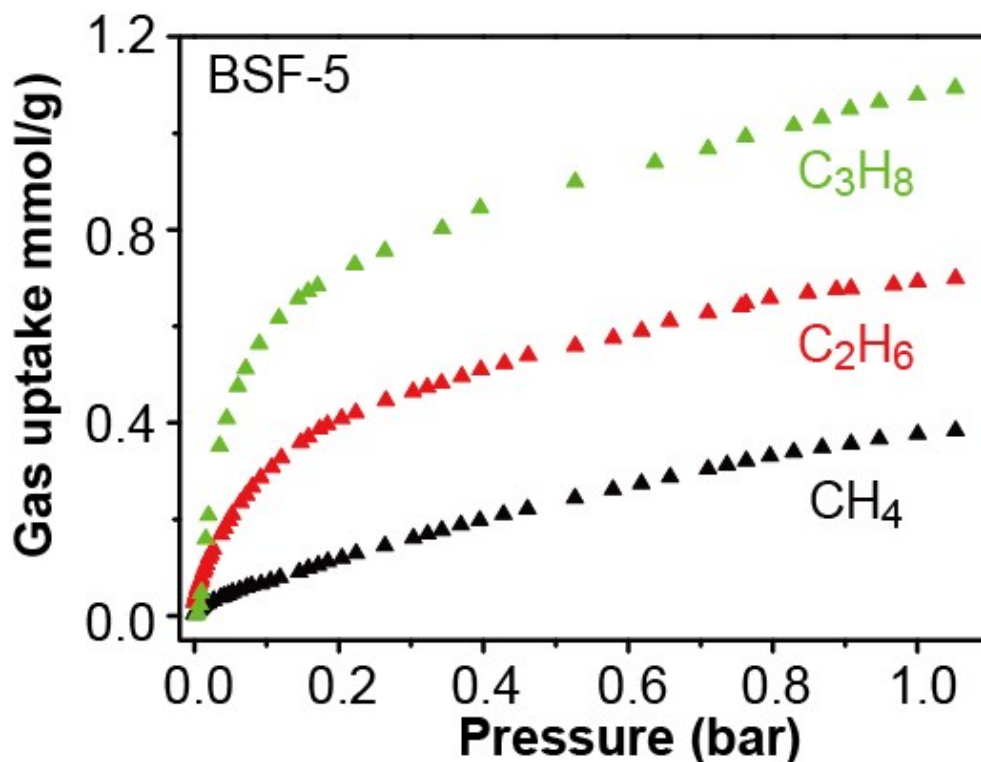

**Fig. S1** C<sub>3</sub>H<sub>8</sub>, C<sub>2</sub>H<sub>6</sub>, CH<sub>4</sub> adsorption isotherms on activated BSF-5 at 298K.

Analysis: the C<sub>3</sub>H<sub>8</sub>, C<sub>2</sub>H<sub>6</sub> and CH<sub>4</sub> uptakes at 298 K and 1 bar were 1.09, 0.70 and 0.38 mmol/g respectively. These values are all very low compared to those of BSF-1. However, it is understandable and consistent with the instability of BSF-5 that was supposed according to the N<sub>2</sub> adsorption experiment and PXRD patterns. The C<sub>3</sub>H<sub>8</sub> capacity was further reduced to 0.9 mmol/g after the activated sample was exposed to air for a week. The calculated C<sub>3</sub>H<sub>8</sub>/CH<sub>4</sub> (1/1) and C<sub>2</sub>H<sub>6</sub>/CH<sub>4</sub> (1/1) IAST selectivity is 7.6 and 2.3.
